# Supplementary material for: The gut microbiome and its potential role in paradoxical anaerobism in pupfishes of the Mojave Desert
Source: Anim Microbiome. 2020 May 19;2:20. doi: 10.1186/s42523-020-00037-5 (PMC7807710; doi:10.1186/s42523-020-00037-5)
Supplement: Supplementary file 2 — Additional file 2: Table S1. Sample Metadata. Table S2. SIMilarity PERcentage (SIMPER) analysis based on Bray-Curtis dissimilarity between antibiotic-treated and control fish. Given is the mean relative abundance in each group and cumulative contribution of nine SVs contributing towards 50% of dissimilarity between the groups. [file 42523_2020_37_MOESM2_ESM.xlsx]

## Sheet: Supplementary Table 1
Supplementary Table 1: Sample Metadata.
Sample	Quality filtered sequence count	Shannon	PA_duration*	Treatment
PUP1	16817	4.86955	3	Antibiotic
PUP10	9628	2.37425	80	Antibiotic
PUP11	10727	0.792643	77	Control
PUP12	74421	0.667057	5	Control
PUP13	9882	3.16312	10	Control
PUP14	4124	4.98905	10	Control
PUP15	18165	5.28624	7	Control
PUP16	82969	0.706373	0	Control
PUP17	10982	4.18366	79	Antibiotic
PUP18	15579	4.42429	93	Antibiotic
PUP19	9870	5.27053	5	Control
PUP2	11875	2.12043	5	Antibiotic
PUP20	32147	5.81927	16	Control
PUP21	9448	3.34552	6	Control
PUP22	4365	2.01051	0	Control
PUP23	20858	6.52884	0	Control
PUP24	12554	3.23228	0	Control
PUP3	9528	2.72542	5	Antibiotic
PUP4	15258	2.95811	69	Antibiotic
PUP5	3713	2.66645	25	Antibiotic
PUP6	17029	3.52107	11	Antibiotic
PUP7	15265	3.72502	4	Antibiotic
PUP8	14635	5.76519	14	Antibiotic
* Time spent in paradoxical anaerobism

## Sheet: Supplementary Table 2
Supplementary Table 2: SIMilarity PERcentage (SIMPER) analysis based on Bray-Curtis dissimilarity between antibiotic-treated and control fish. Given is the mean relative abundance in each group and cumulative contribution of nine SVs contributing towards 50% of dissimilarity between the groups.
	Mean Relative Abundance
SVs	Antibiotic	Control	Cumulative % contribution	Domain	Phylum	Class	Order	Family	Genus	Species
f0a671c41a94f82ba4bd48ba0f69b350	0	0.33	27.38	Bacteria	Fusobacteria	Fusobacteriia	Fusobacteriales	Fusobacteriaceae	Cetobacterium
d2a4add6029e32135562e2da9d4ed2e1	0.21	0.075	33.43	Bacteria	Proteobacteria	Gammaproteobacteria	Enterobacteriales	Enterobacteriaceae	Escherichia-Shigella
dc9cc9e7cdce6beb532a1a2986bf9bc8	0	0.047	36.74	Bacteria	Spirochaetes	Spirochaetia	Brevinematales	Brevinemataceae	Brevinema	unculturedspirochete
545ecf92ba2b93ca148bbb670c8fadf6	0.004	0.065	39.97	Bacteria	Proteobacteria	Gammaproteobacteria	Aeromonadales	Aeromonadaceae	Aeromonas
22bede28c0b8be52cfc0a716540f5ac3	0.082	0.023	42.68	Bacteria	Bacteroidetes	Bacteroidia	Flavobacteriales	Flavobacteriaceae	Flavobacterium
7348712774a127ee43772132e1826d0d	0.033	0.035	45.28	Bacteria	Verrucomicrobia	Verrucomicrobiae	Verrucomicrobiales	Verrucomicrobiaceae	uncultured
56a2bdb8ae6cf2f83b8347c1c3c2d5d8	0	0.024	47.26	Bacteria	Fusobacteria	Fusobacteriia	Fusobacteriales	Fusobacteriaceae	Cetobacterium
6ff8cf203e06d64dc903ee061a3a1ff3	0	0.025	48.89	Bacteria	Proteobacteria	Gammaproteobacteria	Pseudomonadales	Pseudomonadaceae	Pseudomonas	Pseudomonaspeli
954295723a60ca9d668afc3c2144f40c	0.017	0.018	50.22	Bacteria	Firmicutes	Erysipelotrichia	Erysipelotrichales	Erysipelotrichaceae	Ileibacterium	unculturedbacterium
